# Supplementary material for: “Nano to nano” electrodeposition of WO3 crystalline nanoparticles for electrochromic coatings
Source: Royal Society of Chemistry journal article supplement (doi:10.1039/c4ta03431g), 2014-01-01
Supplement: c4ta03431g1.pdf [file c4ta03431g1.pdf]

# "Nano to Nano" Electrodeposition of $\text{WO}_3$ Crystalline Nanoparticles for Electrochromic Coatings

Liang Liu<sup>1,2,‡</sup>, Michael Layani<sup>1,‡</sup>, Shai Yellinek<sup>1</sup>, Alex Kamyshny<sup>1</sup>, Han Ling<sup>2</sup>, Pooi

See Lee<sup>2</sup>, Shlomo Magdassi<sup>1,\*</sup> and Daniel Mandler<sup>1,\*</sup>

<sup>1</sup>Institute of Chemistry, The Hebrew University of Jerusalem, Jerusalem 91904, Israel

<sup>2</sup>School of Materials Science and Engineering, Nanyang Technological University,  
Singapore 639798, Singapore

## Supporting Information

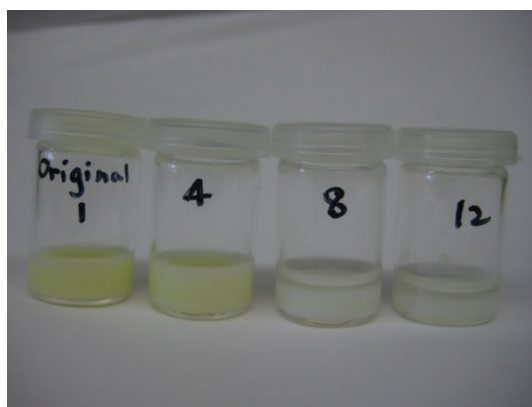

**Fig. S1.** Photos of 5 wt.%  $\text{WO}_3$  dispersion at different pH after 1 h. pH from left to right: 1, 4, 8, 12. pH was adjusted by NaOH.

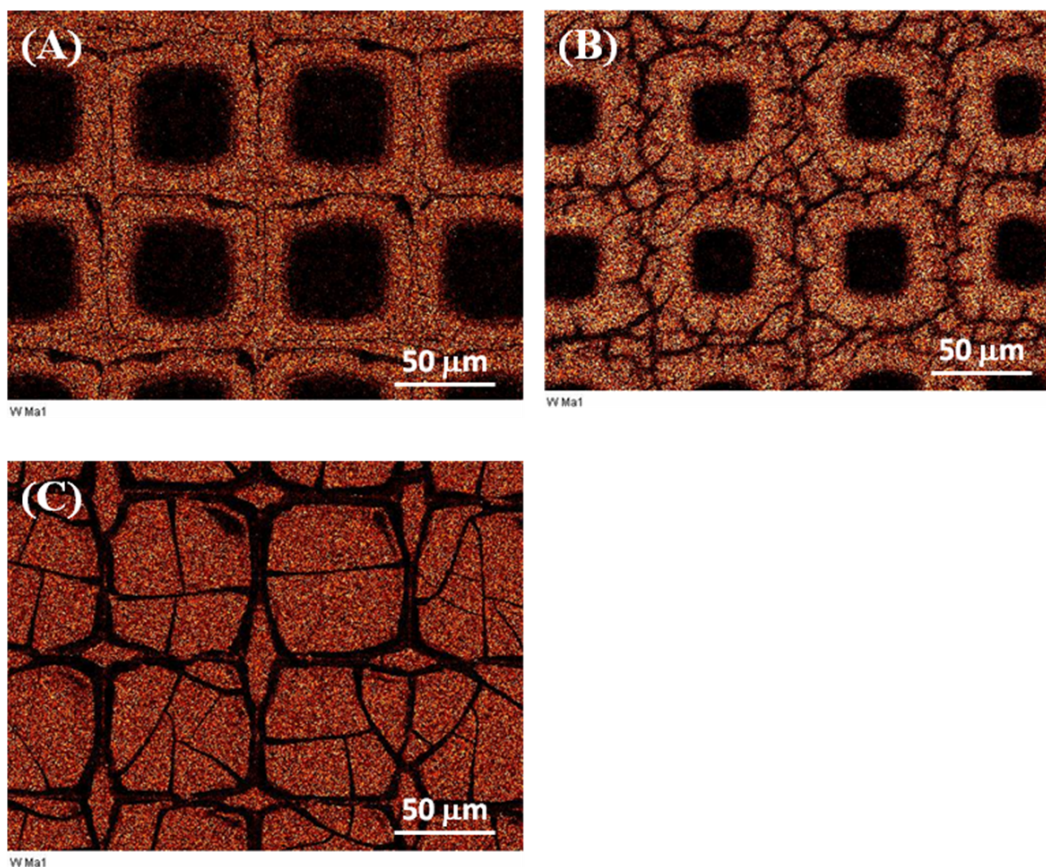

**Fig. S2.** EDX mapping of W for the WO<sub>3</sub> films electrodeposited on Ag grid/PET at -0.8 V (vs. Ag/AgBr QRE) for 3 min (A), 9 min (B) and 13 min (C).

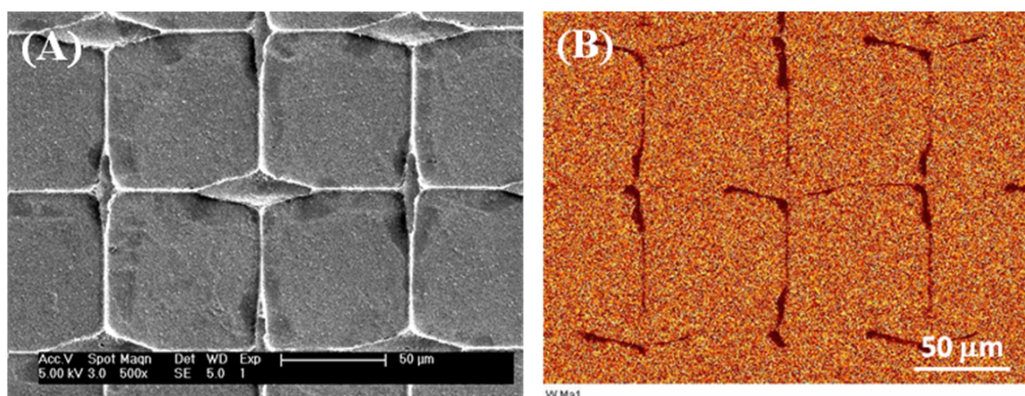

**Fig. S3.** SEM (A) and EDX mapping of W (B) for the WO<sub>3</sub> films electrodeposited on Ag grid/PET at -1.1 V (vs. Ag/AgBr QRE) for 30 s.

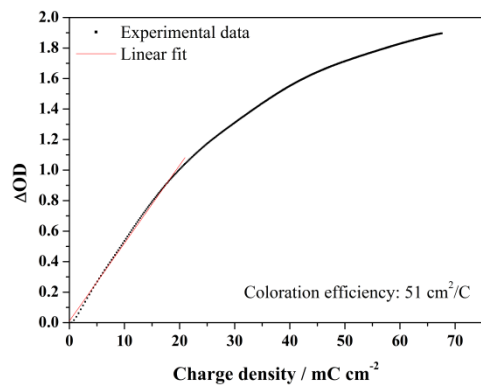

**Fig. S4.** Coloration efficiency of  $\text{WO}_3$  films electrodeposited at  $-1.1 \text{ V}$  (vs.  $\text{Ag}/\text{AgBr}$  QRE) for 100 s on ITO.

**Video S1.** Demonstration of coloring and bleaching of the optimal nano-crystalline  $\text{WO}_3$  film electrodeposited on ITO.
